# Supplementary material for: The interactome of a family of potential methyltransferases in HeLa cells
Source: Springer Nature journal article supplement (doi:10.1038/s41598-019-43010-2), 2019-04-29
Supplement: MOESM1 [file 41598_2019_43010_MOESM1_ESM.pdf › 41598_2019_43010_MOESM1_ESM.pdf]

## **The interactome of a family of potential methyltransferases in HeLa cells**

Valentina V Ignatova<sup>1</sup>, Pascal W.T.C Jansen<sup>2</sup>, Marijke P Baltissen<sup>2</sup>, Michiel Vermeulen<sup>2</sup>★,  
Robert Schneider<sup>1</sup>★

<sup>1</sup>Institute of Functional Epigenetics, Helmholtz Zentrum München, Deutsches  
Forschungszentrum fuer Gesundheit und Umwelt (GmbH) Ingolstaedter Landstr. 1,  
85764, Neuherberg, Germany,

<sup>2</sup>Department of Molecular Biology, Faculty of Science, Radboud Institute for Molecular  
Life Sciences, Oncode Institute, Radboud University Nijmegen, Geert Grooteplein 30,  
6525 GA Nijmegen, The Netherlands,

★Corresponding authors.

### **List of supplementary material**

Supplementary Figure 1. Interactome of METTL family members (log2 fold change >5).

Supplementary Figure 2. Immuno-blot of nuclear and cytoplasmic fractions.

Supplementary Figure 3. Uncropped full size immuno-blot used for Figure 5a.

Supplementary Figure 4. Uncropped full size immuno-blot used for Figure 5b.

Supplementary Table 1. Summary of METTL-interacting proteins.

Supplementary Dataset 1. Excel table with protein and peptide identification data.

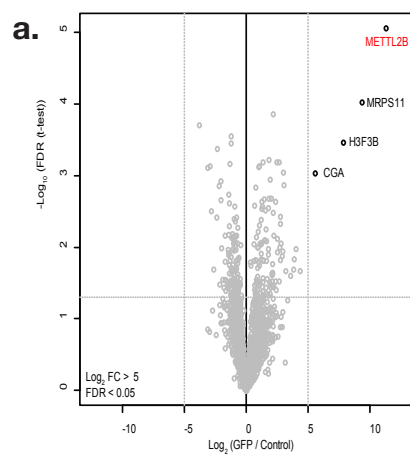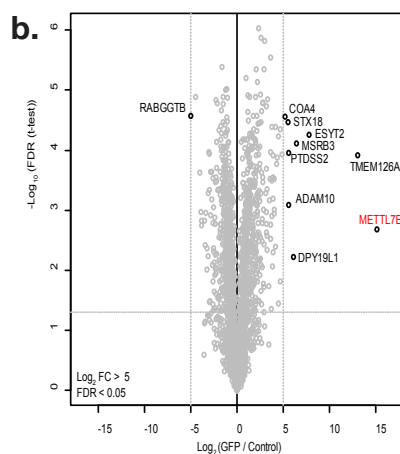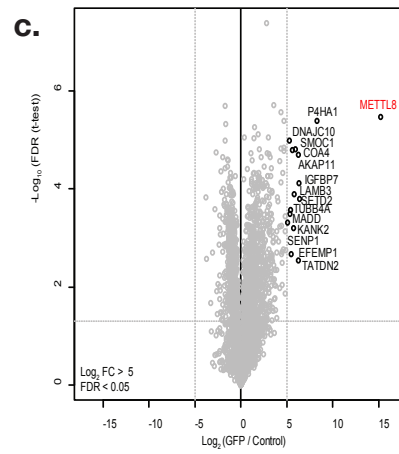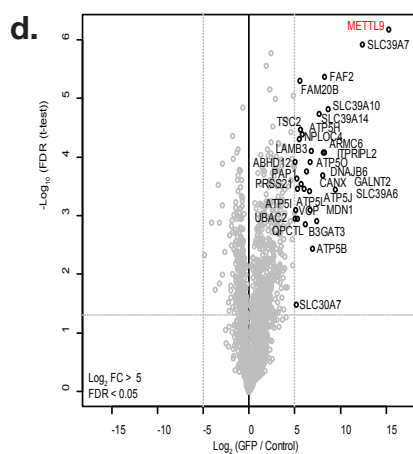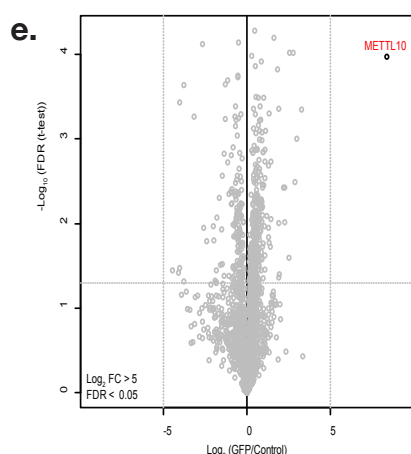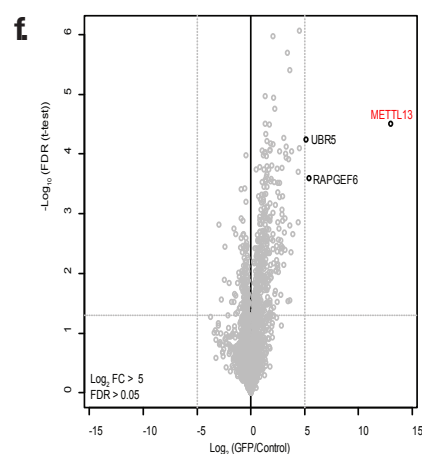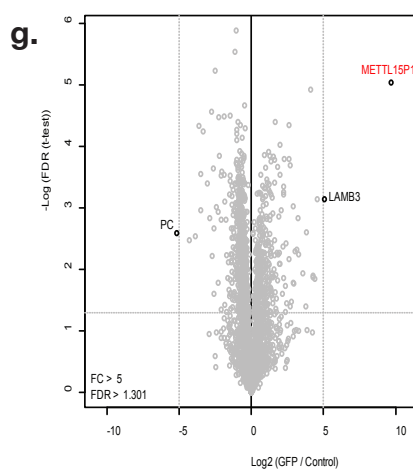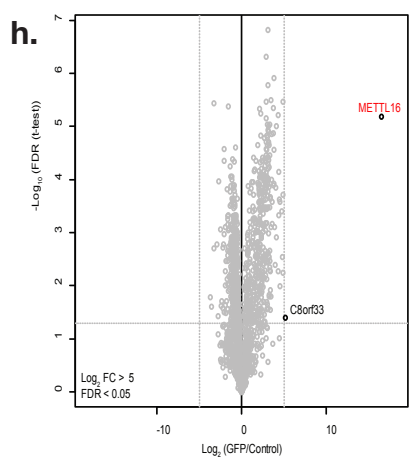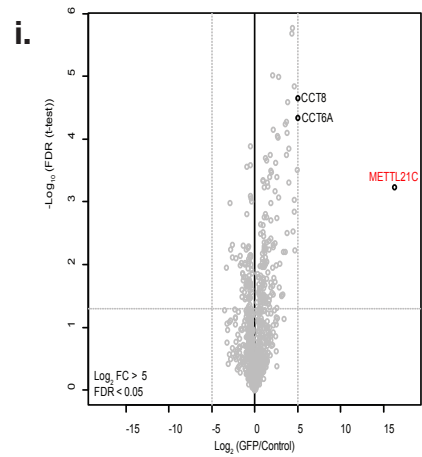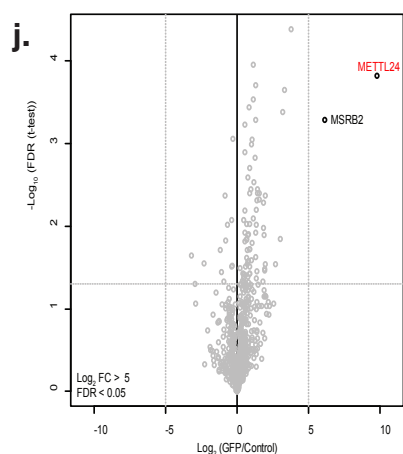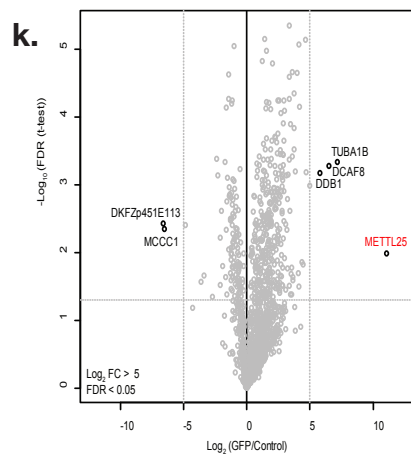

**Supplementary Figure 1. Interactome of METTL family members (log2 fold change >5).**

Volcano plot visualization of interaction partners for: (a) METTL2B, (b) METTL7B, (c) METTL8, (d) METTL9, (e) METTL10, (f) METTL13, (g) METTL15P1, (h) METTL16, (i) METTL21C, (j) METTL24, (k) METTL25. Purifications were performed from whole cell extract. Data displayed as described in the legend of Figure 2 using log2 fold change (FC) > 5 and false discovery rate (FDR) < 0.05 as thresholds. The baits are indicated in red.

**a.**

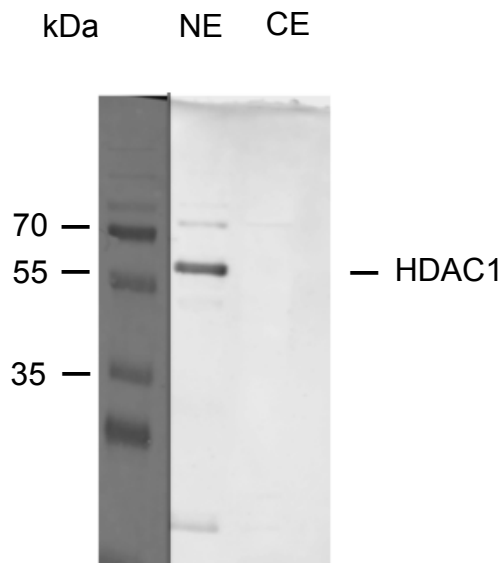

**b.**

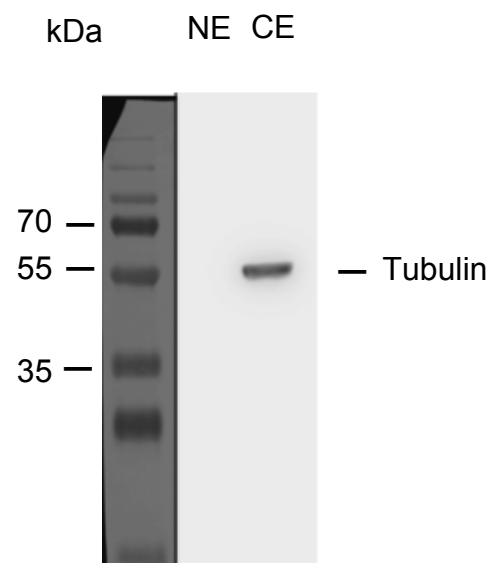

**Supplementary Figure 2. Immuno-blot of nuclear and cytoplasmic fractions.** HDAC1 (a) was detected in nuclear extract (NE) but not in cytoplasmic extract (CE). Tubulin (b) was detected in cytoplasmic but not in nuclear extract. Extract were probed with the indicated antibodies as markers for successful fractionation.

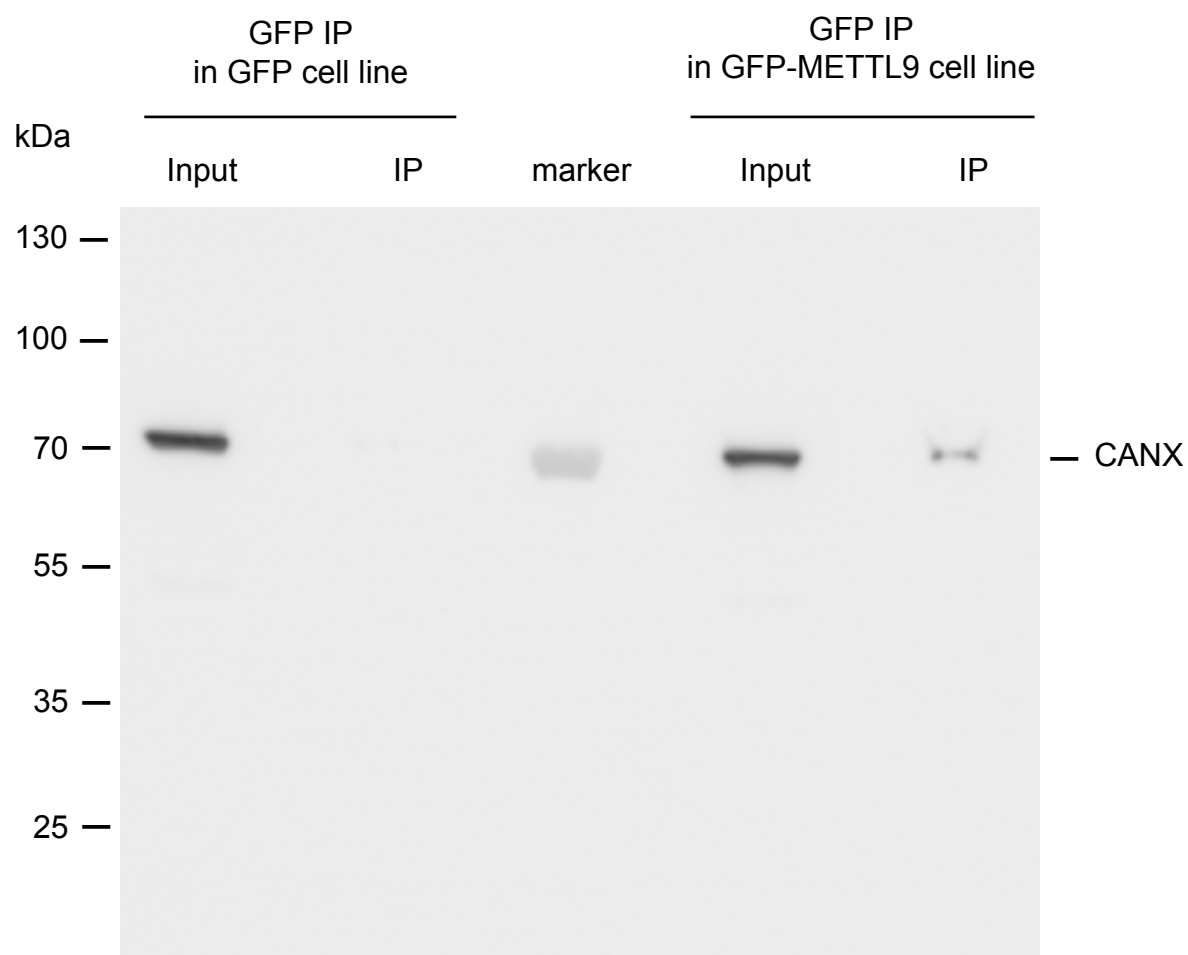

**Supplementary Figure 3. Uncropped full size immuno-blot used for Figure 5a.**

Validation of interaction between METTL9 and calnexin by co-IP. CANX can be detected in GFP-METTL9 IP but not in GFP IP. Labelling corresponds to Fig. 5a.

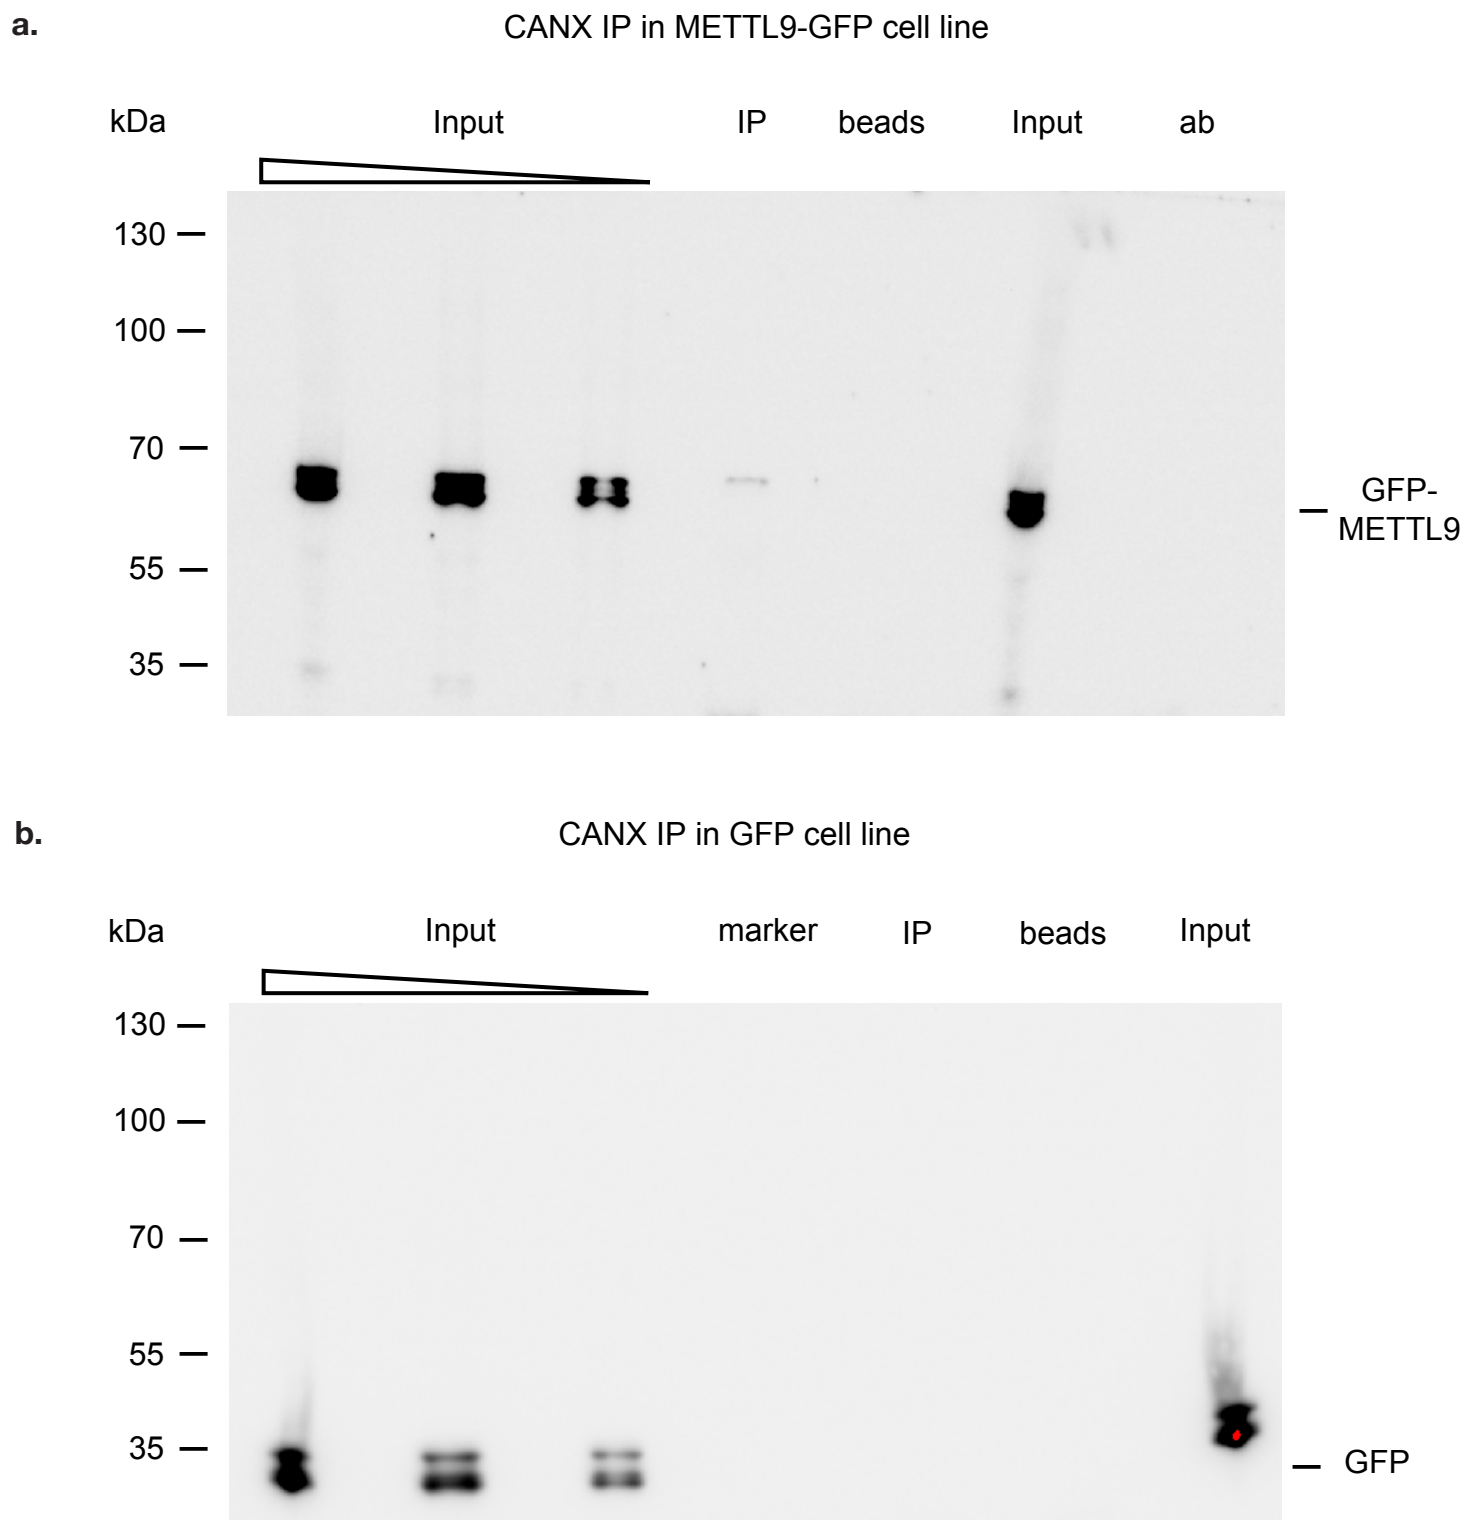

**Supplementary Figure 3. Uncropped full size immuno-blots used for Figure 5b.**

Validation of interaction between METTL9 and Calnexin by co-IP. GFP-METTL9 (a) but not GFP (b) is detected in IP with CANX antibody. Labelling corresponds to Fig. 5b left and Fig. 5b right, correspondingly. Beads indicates no antibody control, ab indicates CANX antibody-only control. To generate Fig. 5b immuno-blots were cropped to encompass only lanes with the lowest amount of Input (200 µg), IP, beads and, for the Fig. 5b right, marker.

**Table 1. Summary of METTL-interacting proteins.**

| <b>Bait</b> | <b>Interacting protein</b> | <b>Function</b>                                                                                                                                |
|-------------|----------------------------|------------------------------------------------------------------------------------------------------------------------------------------------|
| METTL2B     | MRPS11                     | 28S ribosomal protein S11, mitochondrial                                                                                                       |
| METTL7B     | TMEM126A                   | Transmembrane protein 126A, mitochondrial                                                                                                      |
| METTL8      | P4HA1                      | Prolyl 4-hydroxylase subunit alpha-1. Catalyzes the post-translational formation of 4-hydroxyproline in -Xaa-Pro-Gly- sequences                |
| METTL9      | SLC39A7                    | Zinc transporter SLC39A7                                                                                                                       |
|             | SLC39A6                    | Zinc transporter ZIP6                                                                                                                          |
|             | SLC39A10                   | Zinc transporter ZIP10                                                                                                                         |
|             | CANX                       | Calcium-binding protein, Chaperone. Potential role in a quality control of incorrectly folded proteins                                         |
|             | FAF2                       | FAS-associated factor 2. Potential role in unfolded protein response, lipid droplet degradation, insulin-like growth factor receptor signaling |
|             | ARMC6                      | Armadillo repeat- containing protein 6 pathway                                                                                                 |
|             | ITPRIPL2                   | Inositol 1,4,5-trisphosphate receptor-interacting protein-like 2                                                                               |

Proteins were selected using as a cutoff  $\log_2 \text{FC} > 8$ . The functions of interactors according to Uniprot ([www.uniprot.org](http://www.uniprot.org)) are indicated functions are indicated.
